# Supplementary material
Source: publisher site journal article supplement (https://www.spandidos-publications.com/7575/downloadSupplementary)
Supplement: Supplementary file 1 [file downloadSupplementary]

## Sheet: Table SVII
Table SVII. hub-FRDEGs selected by the SVM-RFE algorithm.
FeatureName	FeatureID	Average Rank
PRDX1	16	3.6
DPP4	23	4.3
TGFB1	3	4.7
GDF15	31	5.8
ATM	7	6.9
SIAH2	38	7.5
STEAP3	20	8.1
MAPK14	12	8.2
SOCS1	28	9.7
FTL	19	12
AKR1C1	36	14
TERT	29	14.8
NEDD4	18	15.5
ATF3	15	16.1
TXN	11	17.6
CDC25A	26	17.6
ALOX15B	35	20.9
IDO1	21	21.1
PPARG	1	21.3
CGAS	34	23.5
CBS	24	23.6
TLR4	4	23.7
HMOX1	2	23.9
MAPK3	5	24.4
CAV1	6	25
SAT1	30	25.1
CDKN1A	10	25.4
FLT3	33	25.6
FTH1	13	26.1
MUC1	22	26.6
ALOX5	32	26.7
FURIN	25	27
LCN2	17	27.4
ALOX15	27	29.8
TFR2	37	29.9
TIMP1	9	31.9
HSPB1	8	32.7
CTSB	14	33
